# Supplementary material
Source: publisher figshare collection journal article supplement (https://frontiersin.figshare.com/ndownloader/files/14116925)
Supplement: Supplementary file [file 14116925]

# The origin of unpleasant aftertastes in synthetic sweeteners

Waldo Acevedo and Piero Andrea Temussi

## SUPPLEMENTARY MATERIAL

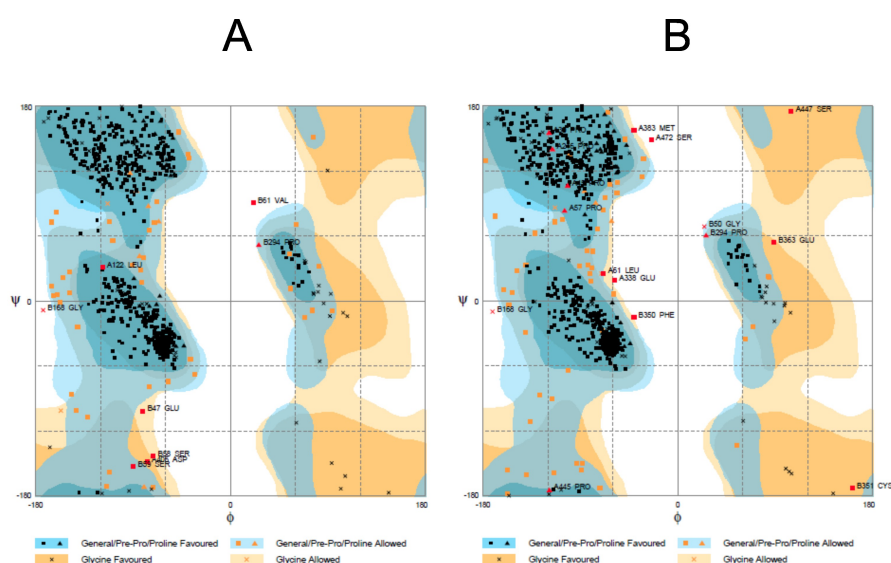

Figure S1. Ramachandran maps of the homology models for the sweet (A) and umami (B) receptors. Ramachandran plots indicate that 92.0% of the residues are in favoured regions, 6.2% in allowed regions and 1.9% in outlier regions for umami receptor; whereas 93.1% of the residues are in favoured regions, 5.9% in allowed regions, and 1.0% in outlier regions for sweet receptor. PROCHECK analyses of the umami and sweet models yielded overall average G factors of -0.37 and -0.32, respectively, which suggest that the conformations both, of main and side chain of the models, are reasonable. The value of QMEAN score for the umami and sweet receptor were -3.35 and -1.82, respectively, pointing that the resulting models were close enough to a set of experimental protein structures from the PDB database.

**Table S1.** Interaction Energies and Potential Binding Sites for T1R3 protomers of Sweet and Umami Taste Receptors.

| ligand                            | HT1R3 (sweet)                                     |                                                                    | HT1R3 (umami)                                     |                                                                    |
|-----------------------------------|---------------------------------------------------|--------------------------------------------------------------------|---------------------------------------------------|--------------------------------------------------------------------|
|                                   | $\Delta G_{\text{binding}}/\text{kcal mole}^{-1}$ | lining residues                                                    | $\Delta G_{\text{binding}}/\text{kcal mole}^{-1}$ | lining residues                                                    |
| saccharin                         | -5.8                                              | H145, S146, G168, Y218, S276, V277, A302                           | -5.8                                              | H145, S146, G168, Y218, S276, V277, A302                           |
| acesulfame                        | -5                                                | H145, S146, Y218, S276, V277, A302                                 | -5                                                | H145, S146, Y218, S276, V277, A302                                 |
| 2-Benzoylbenzoic acid             | -6.7                                              | P42, E45, W72, H145, G168, Y218, S276, V277, A302                  | -6.7                                              | P42, E45, S66, W72, H145, S146, G168, Y218, S276, V277, A302       |
| 2-(4-methylbenzoyl) benzoic acid  | -6.9                                              | S66, W72, H145, S146, S147, G168, Y218, S276, V277, A302           | -6.8                                              | E45, S66, W72, H145, S146, S147, G168, Y218, S276, V277, A302      |
| 2-(4-methoxybenzoyl) benzoic acid | -6.8                                              | P42, E45, S66, W72, H145, S146, S147, G168, Y218, S276, V277, A302 | -6.7                                              | P42, E45, S66, W72, H145, S146, S147, G168, Y218, S276, V277, A302 |
